# Supplementary material for: Yttrium-preintercalated layered manganese oxide as a durable cathode for aqueous zinc-ion batteries
Source: Royal Society of Chemistry journal article supplement (doi:10.1039/d2nr06160k), 2022-12-22
Supplement: d2nr06160k1.pdf [file d2nr06160k1.pdf]

## SUPPORTING INFORMATION

# **Yttrium Preintercalated Layered Manganese Oxide as a Durable Cathode for Aqueous Zinc–Ion Batteries**

**Tzu–Ho Wu\*, Ya–Qi Lin, Jian-Xue Huang**

Department of Chemical and Materials Engineering, National Yunlin  
University of Science and Technology, Yunlin 64002, Taiwan

\*Corresponding author: Tzu–Ho Wu, Assistant Professor

E–mail: [wutzu@yuntech.edu.tw](mailto:wutzu@yuntech.edu.tw)

Website: <https://tzuhowu.wixsite.com/eelab>

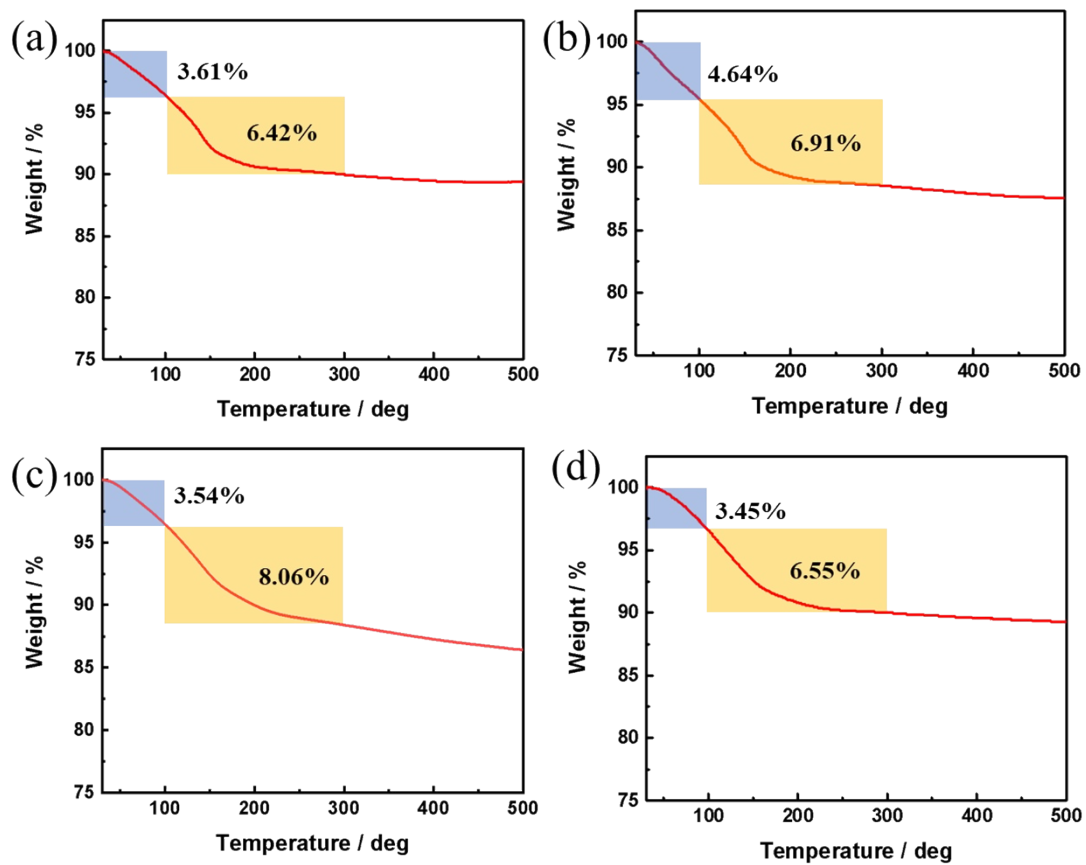

**Figure S1** TGA curves of (a) MO, (b) YMO-0.05, (c) YMO-0.1, and (d) YMO-0.2.

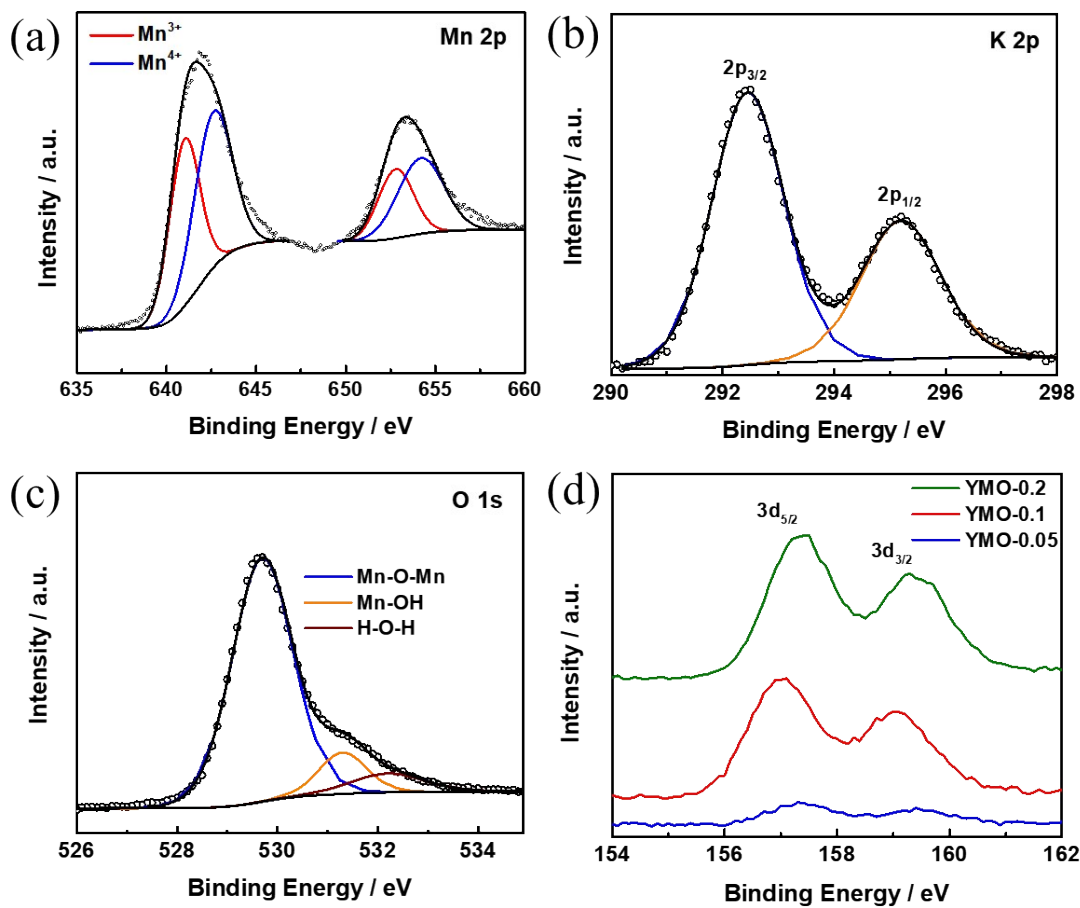

**Figure S2** XPS (a) Mn 2p, (b) K 2p, and (c) O 1s spectra of MO; (d) XPS Y 3d spectra of YMO samples.

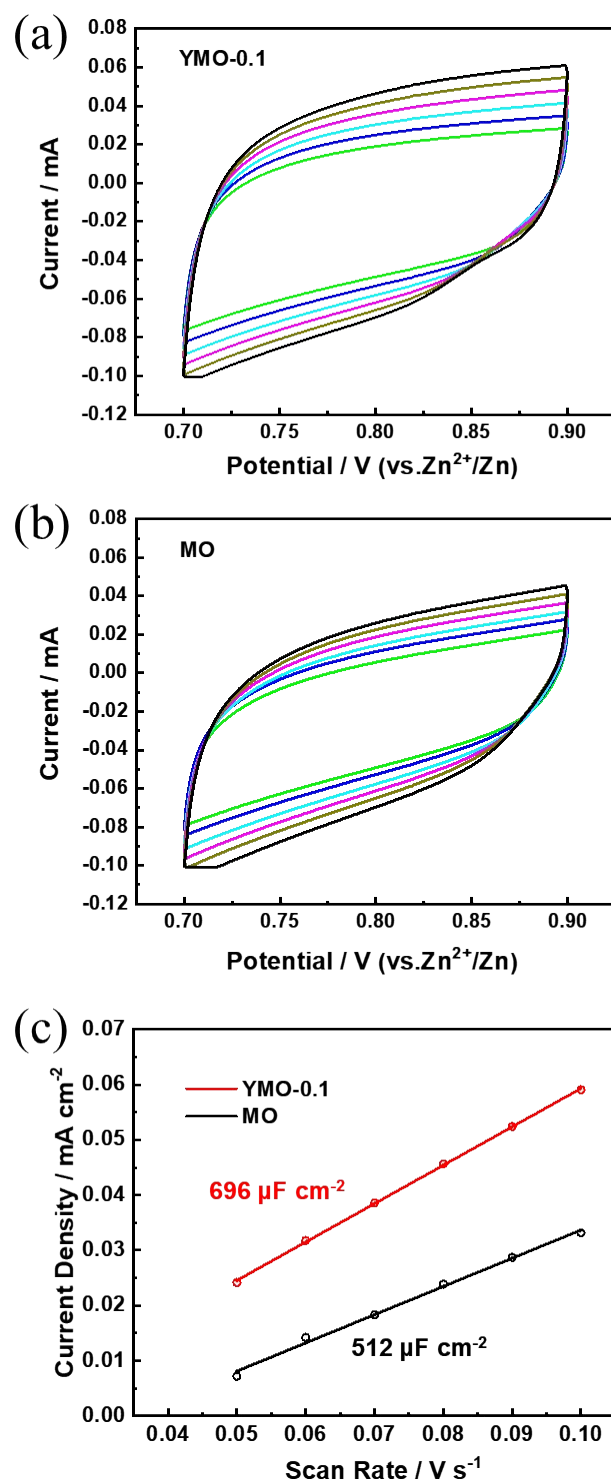

**Figure S3** CV curves of (a) YMO-0.1 and (b) MO measured at the scan rate of 50–100 mV s<sup>-1</sup> in the potential window between 0.7 and 0.9 V and (c) the corresponding double-layer capacitance evaluations of MO and YMO-0.1.

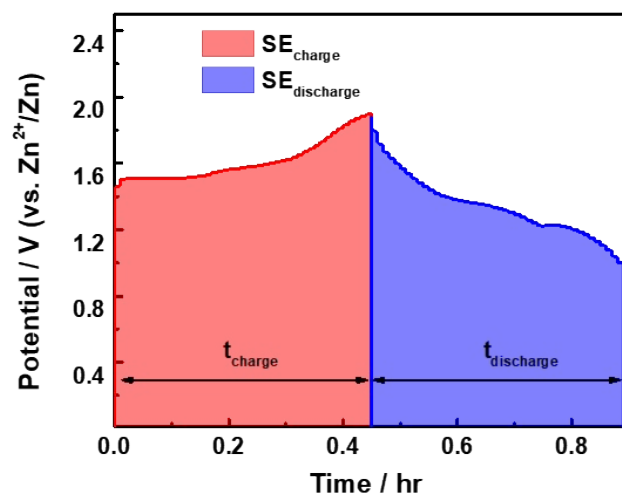

**Figure S4** Evaluation of coulombic efficiency (CE), energy efficiency (EE), and specific energy for YMO-0.1 at  $0.5 \text{ A g}^{-1}$ . Specific energy (SE) can be calculated from the area under the GCD curve.

$$CE = \frac{t_{discharge}}{t_{charge}} \times 100\%$$

$$EE = \frac{SE_{discharge}}{SE_{charge}} \times 100\%$$

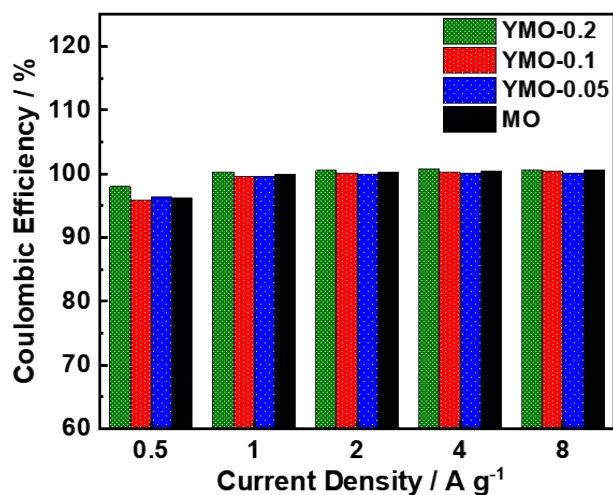

**Figure S5** Coulombic efficiency evaluations of MO and YMO samples.

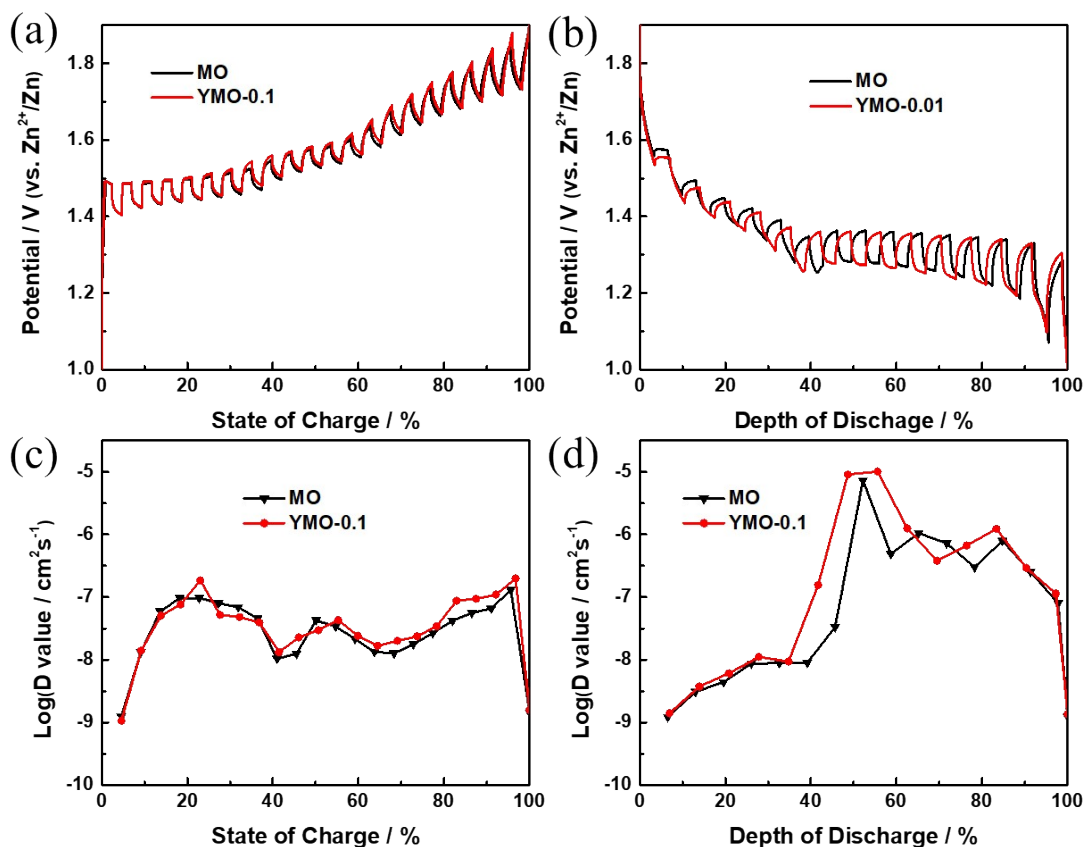

**Figure S6** (a) charge and (b) discharge curves in GITT measurements and (c,d) the corresponding ion diffusion coefficient of MO and YMO-0.1.

GITT measurements were employed to evaluate solid-state ion diffusion in cathode materials based on the following equation:<sup>1-3</sup>

$$D = \frac{4}{\pi\tau} \left( \frac{V_M}{M_B S} \right)^2 \left( \frac{\Delta E_s}{\Delta E_\tau} \right)^2$$

where  $\tau$  stands for the time period for the pulse step (1800 s);  $V_M$  denotes the molar volume of the active material (103.2 cm<sup>3</sup> mol<sup>-1</sup> based on the standard card JCPDS no. 80-1098);  $M_B$  is the molecular weight of MnO<sub>2</sub> (103.9 g mol<sup>-1</sup> for MO and 107.8 for YMO-0.1);  $S$  is the BET surface area (112 m<sup>2</sup> g<sup>-1</sup> for MO and 106 m<sup>2</sup> g<sup>-1</sup> for YMO-0.1);  $\Delta E_\tau$  and  $\Delta E_s$  represent the voltage change (V) during titration and the difference in steady-state voltage (V) between consecutive relaxation steps, respectively.

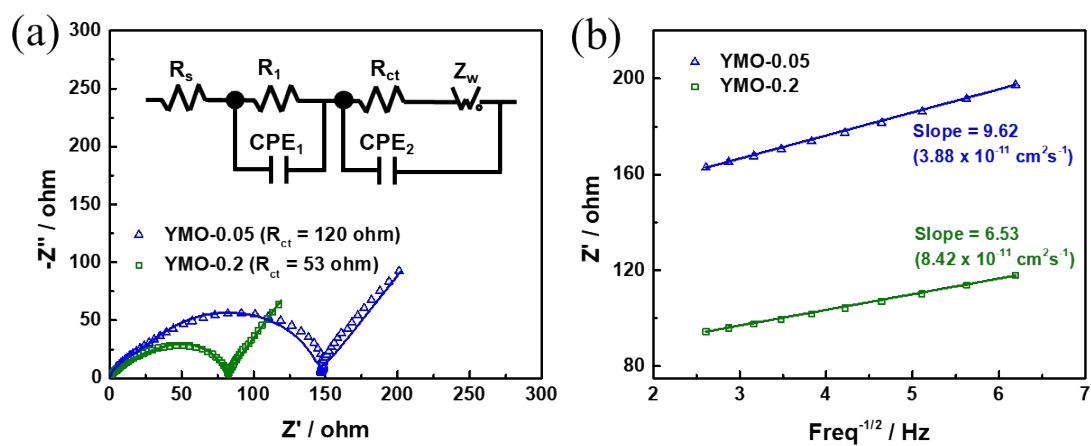

Figure S7 (a) EIS spectra and (b)  $Z'$  vs  $\omega^{-0.5}$  plot of YMO-0.05 and YMO-0.2.

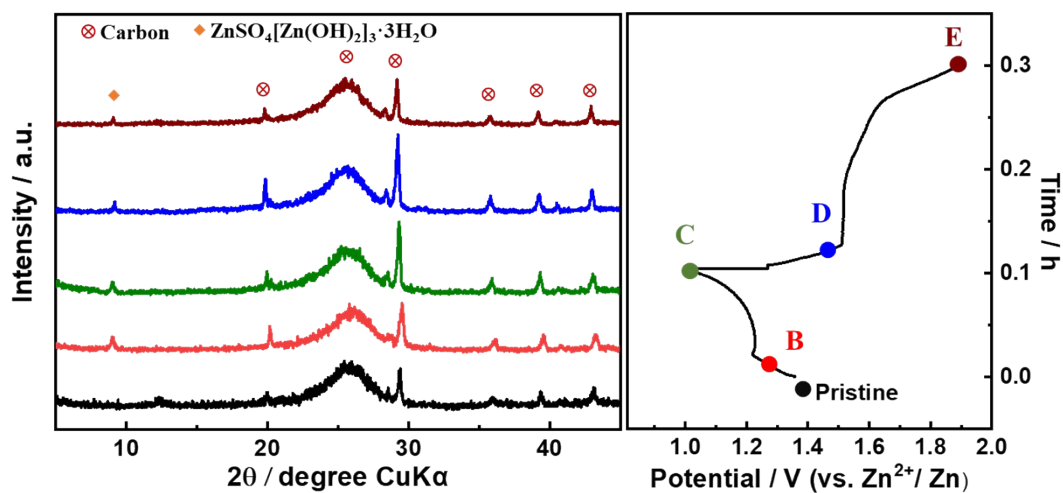

Figure S8 Ex situ XRD patterns of YMO-0.1 cathodes at various charge/discharge states.

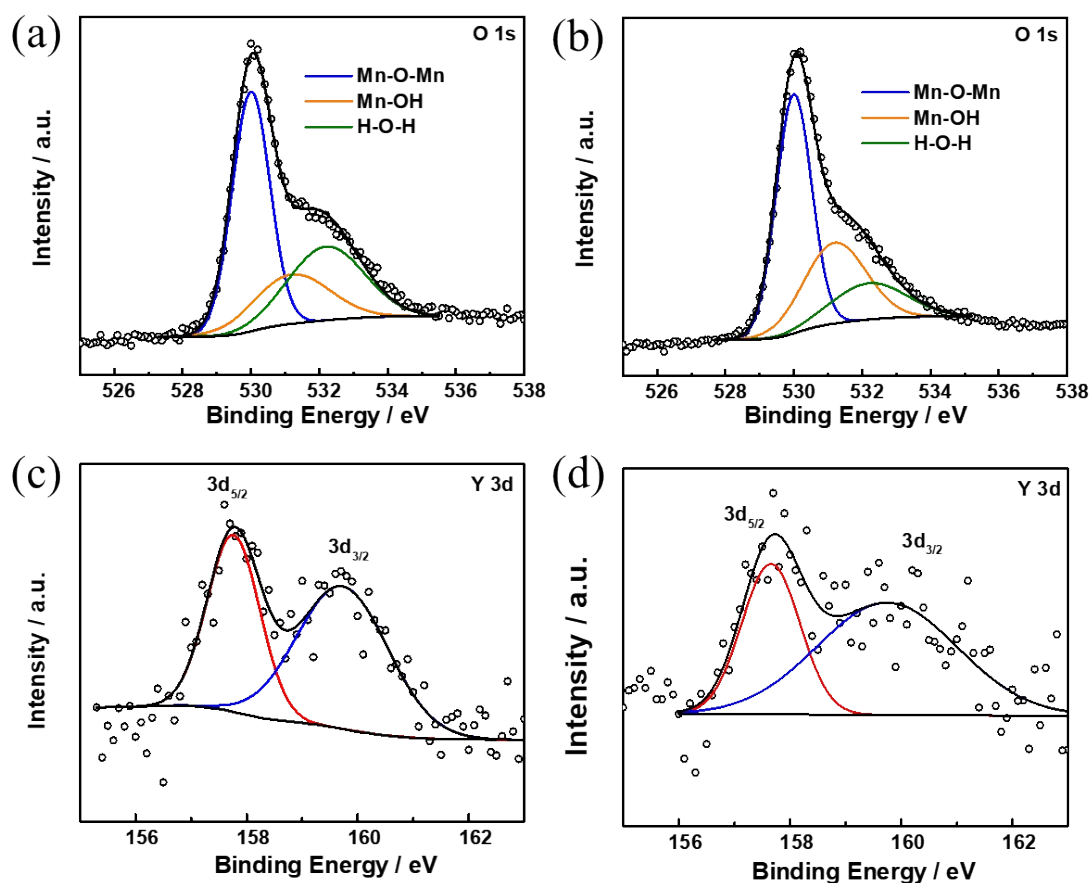

**Figure S9** Ex situ XPS (a,b) O 1s and (c,d) Y 3d spectra of YMO-0.1 cathodes at (a,c) discharged state at 1.0 V and (b,d) charged state at 1.9 V.

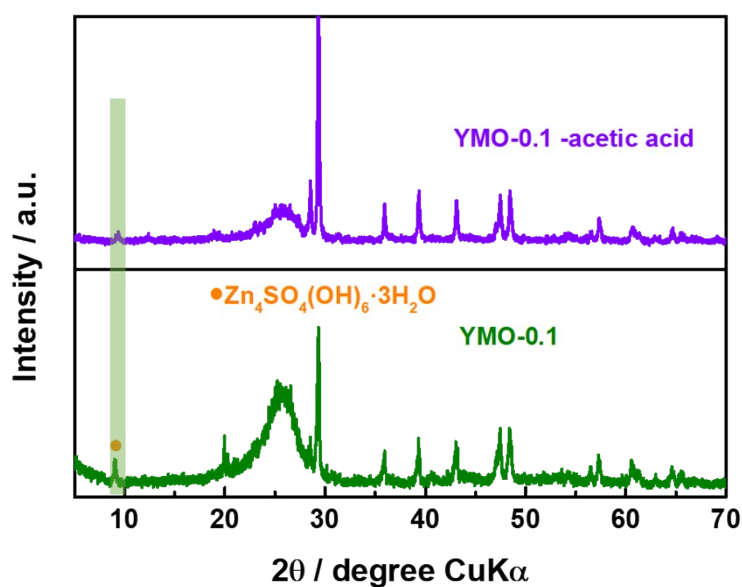

**Figure S10** Comparison of XRD patterns of YMO-0.1 before and after washed with concentrated acetic acid (99.8%).



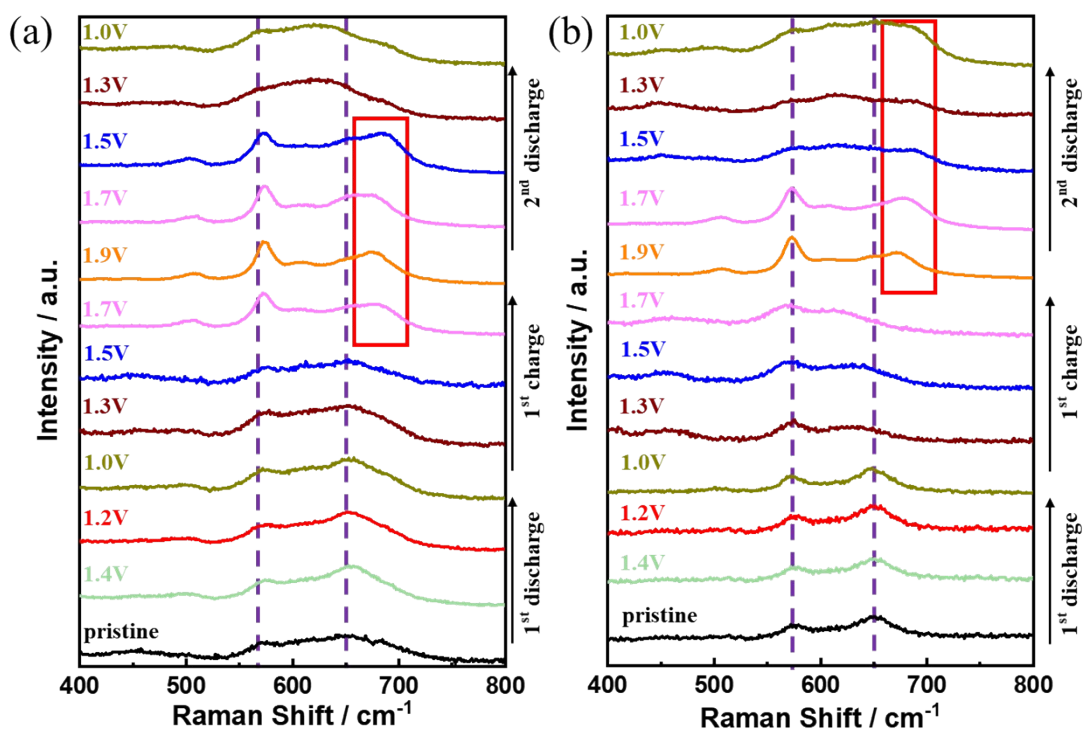

**Figure S11** *In situ* Raman spectra for the 1st discharge, 1st charge, and 2nd discharge processes of (a) YMO-0.1 and (b) MO.

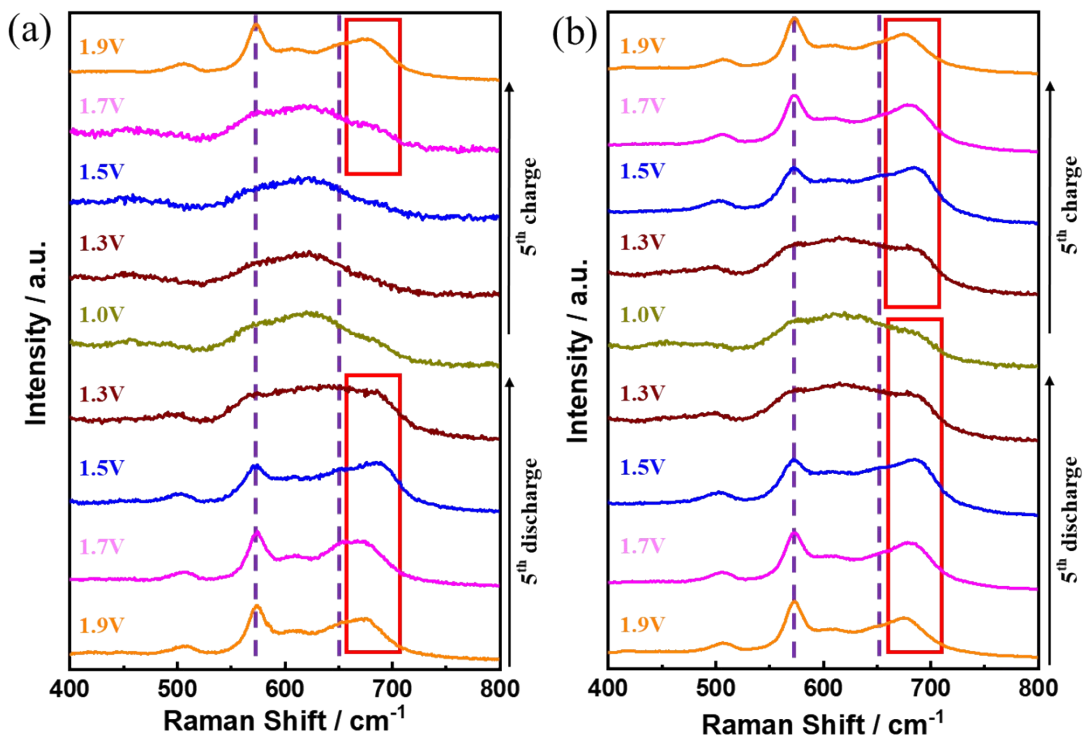

**Figure S12** *In situ* Raman spectra for the 5th cycle of (a) YMO-0.1 and (b) MO.

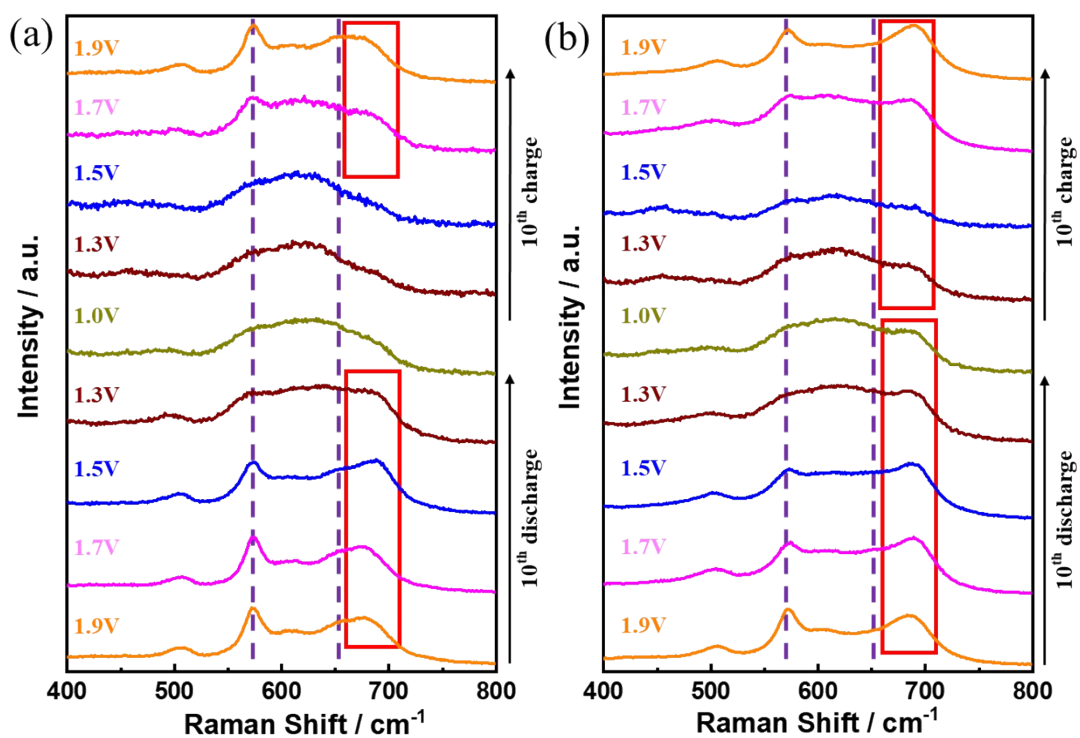

**Figure S13** *In situ* Raman spectra for the 10th cycle of (a) YMO-0.1 and (b) MO.

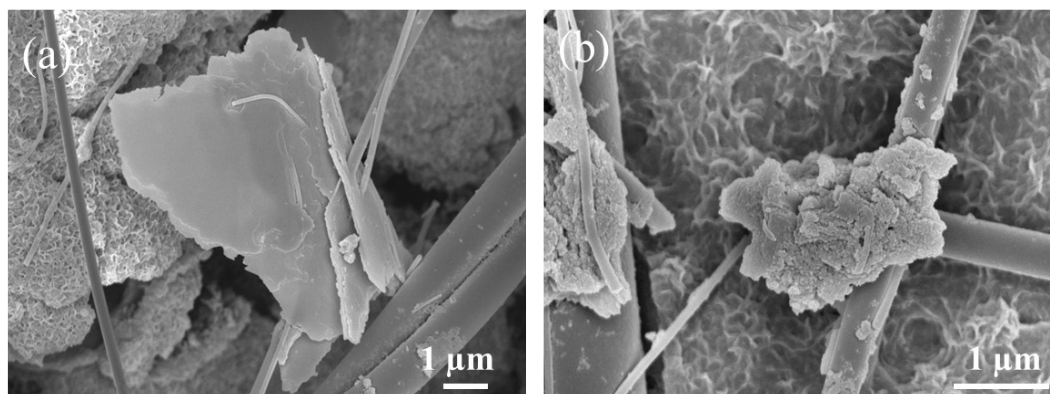

**Figure S14** The SEM observations of (a) ZHS at discharged state (1.0 V) and (b) ZPM at charged state (1.9 V) of YMO-0.1 cathode without washing with concentrated acetic acid (99.8%).

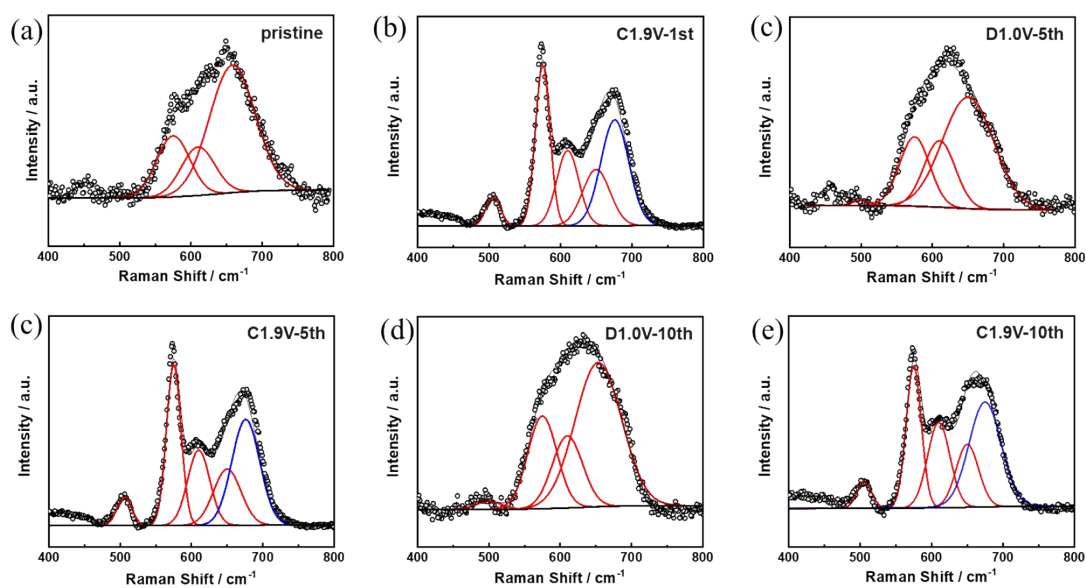

**Figure S15** Lorentz fitting of Raman spectra of YMO-0.1 electrode at (a) pristine state, (b) charged to 1.9 V in the 1st cycle (C1.9V-1st), (c) discharged to 1.0 V in the 5th cycle (D1.0V-5th), (d) charged to 1.9 V in the 5th cycle (C1.9V-5th), (e) discharged to 1.0 V in the 10th cycle (D1.0V-10th), (f) charged to 1.9 V in the 10th cycle (C1.9V-10th). The blue curve corresponds to the formed Zn adsorbed phyllosulfates (ZPS).

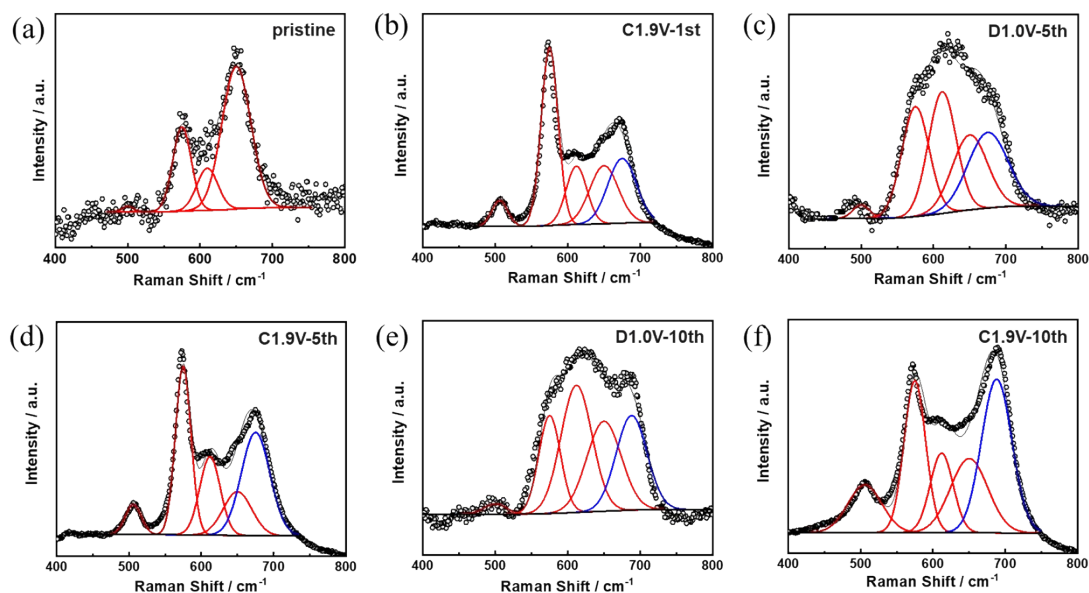

**Figure S16** Lorentz fitting of Raman spectra of MO electrode at (a) pristine state, (b) C1.9V-1st, (c) D1.0V-5th, (d) C1.9V-5th, (e) D1.0V-10th, (f) C1.9V-10th. The blue curve corresponds to the formed Zn adsorbed phyllosulfates (ZPS).

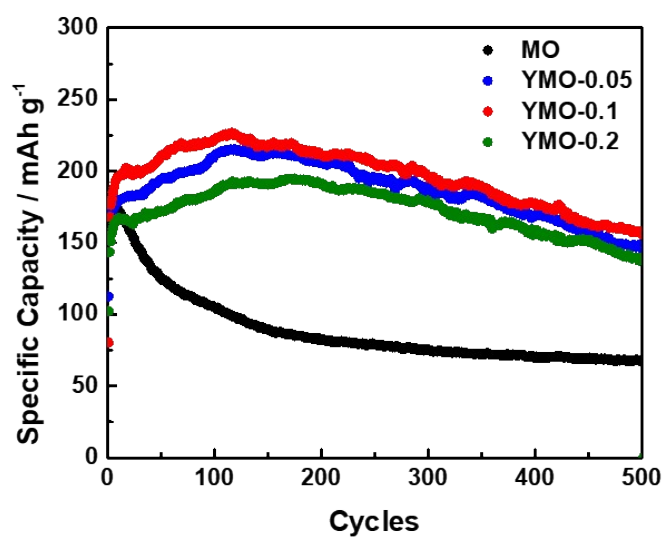

**Figure S17** Cycle performance of MO and YMO samples measured at  $1 \text{ A g}^{-1}$ .

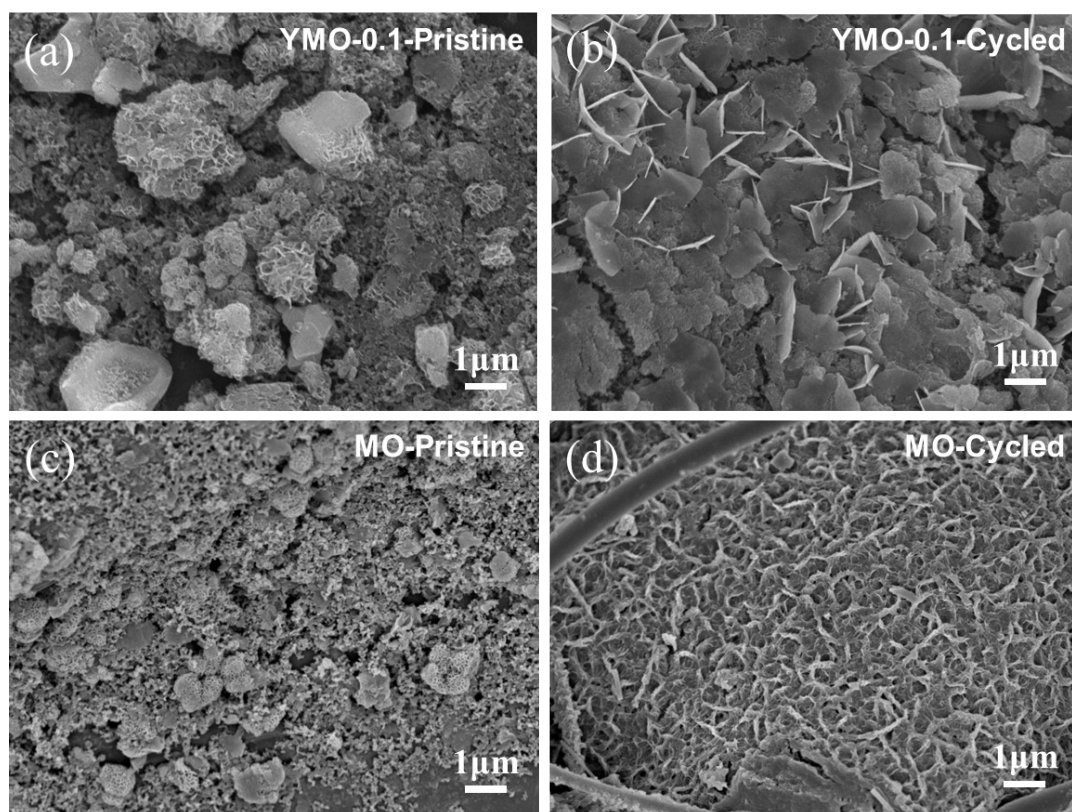

**Figure S18** SEM images of (a,c) pristine and (b,d) cycled electrodes after 2000 cycles at  $4 \text{ A g}^{-1}$  stopped at  $1.9 \text{ V}$  for (a,b) YMO-0.1 and (c,d) MO.

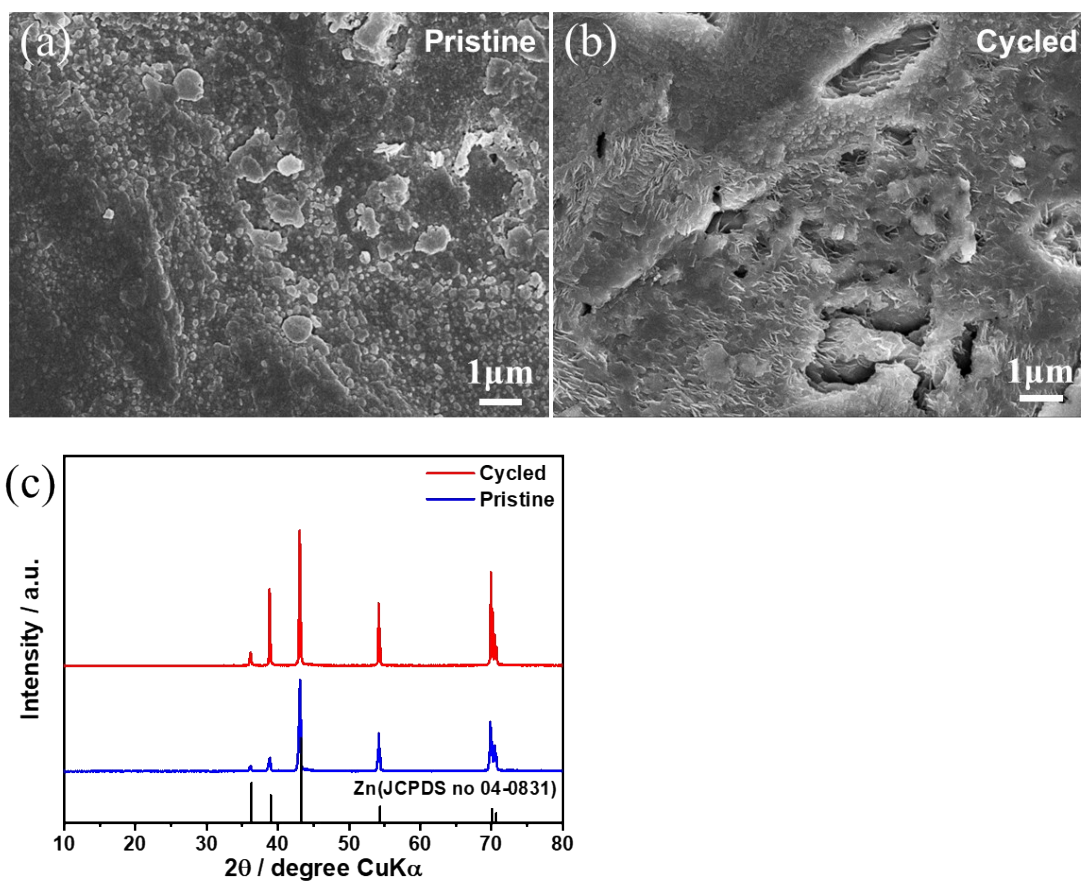

**Figure S19** SEM images of (a) pristine Zn foil and (b) cycled Zn anode (paired with YMO-0.1 cathode) after 2000 cycles at  $4 \text{ A g}^{-1}$ ; (c) XRD pattern of pristine and cycled Zn electrodes.

**Table S1** Electrochemical performances of preintercalated metal cations layered manganese oxide cathodes used in RAZIBs.

| Cathode material                                                                                 | Electrolyte                                          | Voltage window (V) | Discharge capacity (mAh g <sup>-1</sup> )                                                          | Capacity retention / cycles / current density |
|--------------------------------------------------------------------------------------------------|------------------------------------------------------|--------------------|----------------------------------------------------------------------------------------------------|-----------------------------------------------|
| <b>K<sub>0.19</sub>Y<sub>0.05</sub>MnO<sub>2</sub> · 0.50H<sub>2</sub>O nanoflakes (YMO-0.1)</b> | <b>1 M ZnSO<sub>4</sub> + 0.1 M MnSO<sub>4</sub></b> | <b>1.0~1.9</b>     | <b>212 at 0.5 A g<sup>-1</sup><br/>143 at 2.0 A g<sup>-1</sup><br/>114 at 4.0 A g<sup>-1</sup></b> | <b>95% / 3000 / 4.0 A g<sup>-1</sup></b>      |
| Sn <sup>4+</sup> -MnO <sub>2</sub> /SnO <sub>2</sub> nanosheets <sup>4</sup>                     | 2 M ZnSO <sub>4</sub> + 0.1 M MnSO <sub>4</sub>      | 0.8~1.8            | 279.6 at 0.5 A g <sup>-1</sup><br>179.4 at 2.0 A g <sup>-1</sup>                                   | 92.4 % / 2000 / 2.0 A g <sup>-1</sup>         |
| K <sup>+</sup> /Al <sup>3+</sup> -MnO <sub>2</sub> nanosheets <sup>5</sup>                       | 2 M ZnSO <sub>4</sub> + 0.1 M MnSO <sub>4</sub>      | 0.8~1.9            | 269.5 at 0.5 A g <sup>-1</sup><br>85.2 at 2.0 A g <sup>-1</sup>                                    | 76% / 300 / 0.5 A g <sup>-1</sup>             |
| Bi <sup>3+</sup> -MnO <sub>2</sub> nanoflower <sup>6</sup>                                       | 2 M ZnSO <sub>4</sub> + 0.1 M MnSO <sub>4</sub>      | 0.8~1.9            | 130.8 at 0.4 A g <sup>-1</sup><br>65.9 at 2.0 A g <sup>-1</sup>                                    | 98.6% / 1100 / 1.0 A g <sup>-1</sup>          |
| Co <sup>3+</sup> -MnO <sub>2</sub> thin film <sup>7</sup>                                        | 1 M ZnSO <sub>4</sub> + 0.07 M MnSO <sub>4</sub>     | 1.0~1.8            | 288 at 0.3 A g <sup>-1</sup><br>205 at 3.0 A g <sup>-1</sup>                                       | ~100 % / 600 / 1.2 A g <sup>-1</sup>          |
| La <sup>3+</sup> -MnO <sub>2</sub>                                                               | 1 M ZnSO <sub>4</sub> +                              | 0.8~1.9            | 279 at 0.1 A g <sup>-1</sup>                                                                       | 71% / 200 / 0.2 A g <sup>-1</sup>             |

|                                                 |                         |         |                                |                                      |
|-------------------------------------------------|-------------------------|---------|--------------------------------|--------------------------------------|
| nanoflorets <sup>8</sup>                        | 0.4 M MnSO <sub>4</sub> |         | 122 at 1.6 A g <sup>-1</sup>   |                                      |
| Zn <sup>2+</sup> -MnO <sub>2</sub>              | 2 M ZnSO <sub>4</sub> + | 0.8~1.9 | 272 at 0.3 A g <sup>-1</sup>   | 72% / 2000 / 3.0 A g <sup>-1</sup>   |
| nanospheres <sup>9</sup>                        | 0.1 M MnSO <sub>4</sub> |         | 121 at 3.0 A g <sup>-1</sup>   |                                      |
| Cu <sup>2+</sup> -MnO <sub>2</sub>              | 1 M ZnSO <sub>4</sub> + | 1.0~1.9 | 240 at 0.5 A g <sup>-1</sup>   | 99% / 1500 / 4.0 A g <sup>-1</sup>   |
| nanoflakes <sup>10</sup>                        | 0.1 M MnSO <sub>4</sub> |         | 121 at 4.0 A g <sup>-1</sup>   |                                      |
| Ca <sup>2+</sup> -MnO <sub>2</sub>              | 1 M ZnSO <sub>4</sub> + | 0.4~1.9 | 277.7 at 0.35 A                | ~80 % / 5000 / 3.5 A g <sup>-1</sup> |
| nanoflakes <sup>11</sup>                        | 0.1 M MnSO <sub>4</sub> |         | g <sup>-1</sup>                |                                      |
|                                                 |                         |         | 124.5 at 3.5 A g <sup>-1</sup> |                                      |
| K <sup>+</sup> -MnO <sub>2</sub>                | 2 M ZnSO <sub>4</sub> + | 0.4~1.9 | 425 at 0.175 A g <sup>-1</sup> | 93 % / 1500 / 3.5 A g <sup>-1</sup>  |
| nanoflakes <sup>12</sup>                        | 0.2 M MnSO <sub>4</sub> |         | 108 at 3.5 A g <sup>-1</sup>   |                                      |
| Na <sup>+</sup> -Mn <sub>2</sub> O <sub>4</sub> | 2 M ZnSO <sub>4</sub> + | 0.9~1.9 | 232 at 0.616 A g <sup>-1</sup> | 98% / 10000 / 6.16 A g <sup>-1</sup> |
| nanoplates <sup>13</sup>                        | 0.2 M MnSO <sub>4</sub> |         | 134 at 3.08 A g <sup>-1</sup>  |                                      |

---

## References

1. N. Zhang, F. Cheng, Y. Liu, Q. Zhao, K. Lei, C. Chen, X. Liu and J. Chen, *J. Am. Chem. Soc.*, 2016, **138**, 12894-12901.
2. N. Zhang, M. Jia, Y. Dong, Y. Wang, J. Xu, Y. Liu, L. Jiao and F. Cheng, *Adv. Funct. Mater.*, 2019, **29**, 1807331.
3. Y. Dong, S. Di, F. Zhang, X. Bian, Y. Wang, J. Xu, L. Wang, F. Cheng and N. Zhang, *J. Mater. Chem. A*, 2020, **8**, 3252-3261.
4. S. Wang, W. Ma, Z. Sang, F. Hou, W. Si, J. Guo, J. Liang and D. a. Yang, *J. Energy Chem.*, 2022, **67**, 82-91.
5. S. Zhou, X. Wu, H. Du, Z. He, X. Wu and X. Wu, *J. Colloid Interface Sci.*, 2022, **623**, 456-466.
6. F. Long, Y. Xiang, S. Yang, Y. Li, H. Du, Y. Liu, X. Wu and X. Wu, *J. Colloid Interface Sci.*, 2022, **616**, 101-109.
7. F. Kataoka, T. Ishida, K. Nagita, V. Kumbhar, K. Yamabuki and M. Nakayama, *ACS Appl. Energy Mater.*, 2020, **3**, 4720-4726.
8. H. Zhang, Q. Liu, J. Wang, K. Chen, D. Xue, J. Liu and X. Lu, *J. Mater. Chem. A*, 2019, **7**, 22079-22083.
9. J. Wang, J.-G. Wang, H. Liu, C. Wei and F. Kang, *J. Mater. Chem. A*, 2019, **7**, 13727-13735.
10. T. H. Wu, W. Y. Liang and Y. Q. Lin, *J. Taiwan Inst. Chem. Eng.*, 2022, **131**, 104172.
11. T. Sun, Q. Nian, S. Zheng, J. Shi and Z. Tao, *Small*, 2020, **16**, 2000597.
12. T. Sun, Q. Nian, S. Zheng, X. Yuan and Z. Tao, *J. Power Sources*, 2020, **478**, 228758.
13. D. Wang, L. Wang, G. Liang, H. Li, Z. Liu, Z. Tang, J. Liang and C. Zhi, *ACS Nano*, 2019, **13**, 10643-10652.
